# Supplementary material for: Nitrous oxide emission from pigeon pea – maize rotation in response to conservation agriculture and biochar amendments in a Ferralsol, northern Uganda
Source: Copernicus journal article supplement (doi:10.5194/egusphere-2025-1939), 2025-05-14
Supplement: Supplementary file 1 [file egusphere-2025-1939-supplement.pdf]

Nitrous oxide emission from a Ferralsol in pigeon pea – maize rotation under conservation  
agriculture and biochar amendments in northern Uganda

Talent Namatsheve <sup>1,2,\*</sup>, Vegard Martinsen <sup>1</sup>, Jan Mulder <sup>1</sup>, Alfred Obia <sup>3</sup>, Peter Dörsch <sup>1</sup>

<sup>1</sup> Faculty of Environmental Sciences and Natural Resource Management, Norwegian  
University of Life Sciences, P.O Box 5003, 1432 Ås, Norway

<sup>2</sup> Faculty of Plant and Animal Sciences and Technology, Marondera University of Agricultural  
Sciences and Technology, P.O. Box 35, Marondera, Zimbabwe

<sup>3</sup> Department of Agronomy, Faculty of Agriculture and Environment, Gulu University, P.O.  
Box 166, Gulu, Uganda

\*Corresponding author: [talent.namatsheve@nmbu.no](mailto:talent.namatsheve@nmbu.no); [namatshevetalent@gmail.com](mailto:namatshevetalent@gmail.com)

## Supplementary material

## Methodology

Table S1: Model selection and summary statistics of ANOVA for effect of rotation (conventional and convent MM) on hourly N<sub>2</sub>O fluxes (μg m<sup>2</sup> h<sup>-1</sup>). Variance and standard deviation (SD) are shown for the random effect and chi-square (χ<sup>2</sup>), degrees of freedom (df) and significance (P-value) are shown for the fixed effects

| Models                                                                        | AIC           | BIC           |
|-------------------------------------------------------------------------------|---------------|---------------|
| mod1: N2Oflux ~ treatment × season × position + (1   block) + (1   frequency) | 2364.9        | 2404.6        |
| <b>mod2: N2Oflux ~ treatment × position + (1   block) + (1   frequency)</b>   | <b>2359.3</b> | <b>2384.6</b> |

| Random effects     | Variance | SD     |
|--------------------|----------|--------|
| Sampling frequency | 45.44    | 6.741  |
| Block              | 0        | 0      |
| Residual           | 301.24   | 17.356 |

| Fixed effects        | χ <sup>2</sup> | df | P-value |
|----------------------|----------------|----|---------|
| Treatment            | 1471.99        | 1  | 0.03    |
| Position             | 1375.06        | 1  | 0.03    |
| Treatment × Position | 1379.33        | 1  | 0.03    |

$$Y_{ijk} = \beta_0 + \beta_1 \cdot \text{treatment}_{ij} + \beta_2 \cdot \text{position}_{ij} + \beta_3 \cdot (\text{treatment} \times \text{position})_{ij} + u_k + v_j + \epsilon_{ijk}$$

Table S2: Model selection and summary statistics of ANOVA for effect of tillage (Conventional, CA, CA+BC) on hourly N<sub>2</sub>O fluxes (μg m<sup>2</sup> h<sup>-1</sup>). Variance and standard deviation (SD) are shown for the random effect and chi-square (χ<sup>2</sup>), degrees of freedom (df) and significance (P-value) are shown for the fixed effects

| Models                                                                        | AIC           | BIC           |
|-------------------------------------------------------------------------------|---------------|---------------|
| mod1: N2Oflux ~ treatment × season × position + (1   block) + (1   frequency) | 3432.5        | 3492.7        |
| <b>mod2: N2Oflux ~ treatment × position + (1   block) + (1   frequency)</b>   | <b>3424.2</b> | <b>3460.3</b> |

| Random effects     | Variance | SD     |
|--------------------|----------|--------|
| Sampling frequency | 47.58    | 6.897  |
| Block              | 0        | 0      |
| Residual           | 229.57   | 15.152 |

| Fixed effects        | χ <sup>2</sup> | df | P-value |
|----------------------|----------------|----|---------|
| Treatment            | 2297.11        | 2  | 0.01    |
| Position             | 631.92         | 1  | 0.09    |
| Treatment × Position | 2201.69        | 2  | 0.01    |

$$Y_{ijk} = \beta_0 + \beta_1 \cdot \text{treatment}_{ij} + \beta_2 \cdot \text{position}_{ij} + \beta_3 \cdot (\text{treatment} \times \text{position})_{ij} + u_k + v_j + \epsilon_{ijk}$$

Table S3: Model selection and summary statistics of ANOVA on effect of rotation on ammonium (mg kg<sup>-1</sup>). Variance and standard deviation (SD) are shown for the random effect and chi-square ( $\chi^2$ ), degrees of freedom (df) and significance (P-value) are shown for the fixed effects. Results are presented in Fig 2a, b.

| Models                                                       | AIC           | BIC           |
|--------------------------------------------------------------|---------------|---------------|
| mod1: ammonium ~ treatment × season × position + (1   block) | 2538.3        | 2574.0        |
| <b>mod2: ammonium ~ treatment + season + (1   block)</b>     | <b>2530.5</b> | <b>2548.4</b> |

| Random effects | Variance | SD     |
|----------------|----------|--------|
| Block          | 3.854    | 1.963  |
| Residual       | 847.086  | 29.105 |

| Fixed effects | $\chi^2$ | df | P-value |
|---------------|----------|----|---------|
| Treatment     | 5214.11  | 1  | 0.01    |
| Position      | 4524.97  | 1  | 0.02    |

$$Y_{ijk} = \beta_0 + \beta_1 \cdot \text{treatment}_j + \beta_2 \cdot \text{season}_{ij} + u_k + \epsilon_{ijk}$$

Table S4: Model selection and summary statistics of ANOVA on effect of rotation (2 treatments) on nitrate (mg kg<sup>-1</sup>). Variance and standard deviation (SD) are shown for the random effect and chi-square ( $\chi^2$ ), degrees of freedom (df) and significance (P-value) are shown for the fixed effects. Results are presented in Fig 2c, d.

| Models                                                      | AIC           | BIC           |
|-------------------------------------------------------------|---------------|---------------|
| mod1: nitrate ~ treatment × season × position + (1   block) | 1876.6        | 1912.3        |
| <b>mod2: nitrate ~ treatment + season + (1   block)</b>     | <b>1868.5</b> | <b>1886.4</b> |

| Random effects | Variance | SD    |
|----------------|----------|-------|
| Block          | 0        | 0.000 |
| Residual       | 68.64    | 8.285 |

| Fixed effects | $\chi^2$ | df | P-value |
|---------------|----------|----|---------|
| Treatment     | 1.939    | 2  | 0.867   |
| Season        | 150.417  | 1  | 0.139   |

$$Y_{ijk} = \beta_0 + \beta_1 \cdot \text{treatment}_{ij} + \beta_2 \cdot \text{season}_{ij} + u_k + \epsilon_{ijk}$$

Table S5: Model selection and summary statistics of ANOVA on effect of tillage (Conventional, CA, CA+BC) on ammonium (mg kg<sup>-1</sup>). Variance and standard deviation (SD) are shown for the random effect and chi-square ( $\chi^2$ ), degrees of freedom (df) and significance (P-value) are shown for the fixed effects. Results are presented in Fig 3a.

| Models                                                       | AIC           | BIC           |
|--------------------------------------------------------------|---------------|---------------|
| mod1: ammonium ~ treatment × season × position + (1   block) | 3870.7        | 3926.5        |
| <b>mod2: ammonium ~ treatment + (1   block)</b>              | <b>3864.5</b> | <b>3884.6</b> |

| Random effects | Variance | SD     |
|----------------|----------|--------|
| Block          | 5.005    | 2.237  |
| Residual       | 914.410  | 30.239 |

| Fixed effects | $\chi^2$ | df | P-value |
|---------------|----------|----|---------|
| Treatment     | 7122.03  | 2  | 0.02    |

$$Y_{ijk} = \beta_0 + \beta_1 \cdot \text{treatment}_{ij} + u_k + \epsilon_{ijk}$$

Table S6: Model selection and summary statistics of ANOVA on effect of tillage on nitrate (mg kg<sup>-1</sup>). Variance and standard deviation (SD) are shown for the random effect and chi-square ( $\chi^2$ ), degrees of freedom (df) and significance (P-value) are shown for the fixed effects. Results are presented in Fig 3b.

| Models                                                      | AIC           | BIC           |
|-------------------------------------------------------------|---------------|---------------|
| mod1: nitrate ~ treatment × season × position + (1   block) | 3373.6        | 3429.7        |
| <b>mod2: nitrate ~ treatment + (1   block)</b>              | <b>3368.2</b> | <b>3388.2</b> |

| Random effects | Variance | SD    |
|----------------|----------|-------|
| Block          | 0        | 0.000 |
| Residual       | 233.7    | 15.29 |

| Fixed effects | $\chi^2$ | df | P-value |
|---------------|----------|----|---------|
| Treatment     | 145.259  | 2  | 0.733   |

$$Y_{ijk} = \beta_0 + \beta_1 \cdot \text{treatment}_{ij} + u_k + \epsilon_{ijk}$$

Table S7: Model selection and summary statistics of ANOVA on effect of WFPS on N<sub>2</sub>O. Variance and standard deviation (SD) are shown for the random effect and chi-square ( $\chi^2$ ), degrees of freedom (df) and significance (P-value) are shown for the fixed effects. Results are presented in Fig 4.

| Models                                                   | AIC           | BIC           |
|----------------------------------------------------------|---------------|---------------|
| mod1: WFPS ~ treatment × season × position + (1   block) | 4658.5        | 4735.5        |
| <b>mod2: WFPS ~ season + (1   block)</b>                 | <b>4634.8</b> | <b>4651.9</b> |

| Random effects | Variance | SD    |
|----------------|----------|-------|
| Block          | 0        | 0.000 |
| Residual       | 339.2    | 18.42 |

| Fixed effects | $\chi^2$ | df | P-value |
|---------------|----------|----|---------|
| Season        | 4695.465 | 1  | 0.0002  |

$$Y_{ijk} = \beta_0 + \beta_1 \cdot \text{treatment}_j + \beta_2 \cdot \text{season}_j + u_k + \epsilon_{ij}$$

Table S8: Model selection and summary statistics of ANOVA on effect of total mineral N on N<sub>2</sub>O. Variance and standard deviation (SD) are shown for the random effect and chi-square ( $\chi^2$ ), degrees of freedom (df) and significance (P-value) are shown for the fixed effects. Results are presented in Fig 4.

| Models                                                                                  | AIC           | BIC           |
|-----------------------------------------------------------------------------------------|---------------|---------------|
| mod1: mineralN ~ treatment × season × position + (1   block) + (1   sampling frequency) | 4861.8        | 4943.1        |
| <b>mod2: mineralN ~ treatment + (1   block) + (1   sampling frequency)</b>              | <b>4851.8</b> | <b>4881.8</b> |

| Random effects     | Variance | SD     |
|--------------------|----------|--------|
| Sampling frequency | 320.81   | 17.911 |
| Block              | 10.88    | 3.298  |
| Residual           | 451.76   | 21.255 |

| Fixed effects | $\chi^2$ | df | P-value |
|---------------|----------|----|---------|
| Treatment     | 7195.94  | 3  | 0.001   |

$$Y_{ijk} = \beta_0 + \beta_1 \cdot \text{treatment}_j + \beta_2 \cdot \text{season}_j + u_k + \epsilon_{ij}$$

Table S9: Model selection and summary statistics of ANOVA for effect of rotation on cumulative N<sub>2</sub>O emissions (kg N<sub>2</sub>O-N ha<sup>-1</sup>) in season one and two. Variance and standard deviation (SD) are shown for the random effect and chi-square ( $\chi^2$ ), degrees of freedom (df) and significance (P-value) are shown for the fixed effects. Results are presented in Fig 5a, 5b, S3.

| Models                                                     | AIC           | BIC          |
|------------------------------------------------------------|---------------|--------------|
| mod1: cumN2O ~ treatment × season × position + (1   block) | 0.954         | 15.611       |
| <b>mod2: nitrate ~ treatment + position (1   block)</b>    | <b>-3.485</b> | <b>3.843</b> |

  

| Random effects | Variance | SD    |
|----------------|----------|-------|
| Block          | 0.003    | 0.061 |
| Residual       | 0.036    | 0.189 |

  

| Fixed effects | $\chi^2$ | df | P-value |
|---------------|----------|----|---------|
| Treatment     | 0.071    | 1  | 0.169   |
| Position      | 0.133    | 1  | 0.063   |

Table S10: Model selection and summary statistics of ANOVA for effect of rotation on cumulative N<sub>2</sub>O emissions (kg N<sub>2</sub>O-N ha<sup>-1</sup>) for both seasons. Variance and standard deviation (SD) are shown for the random effect and chi-square ( $\chi^2$ ), degrees of freedom (df) and significance (P-value) are shown for the fixed effects. Results are presented in Fig 5c, S3c.

| Models                                                 | AIC           | BIC           |
|--------------------------------------------------------|---------------|---------------|
| mod1: cumN2O ~ treatment × position + (1   block)      | 17.998        | 22.633        |
| <b>mod2: cumN2O ~ treatment + position (1   block)</b> | <b>17.946</b> | <b>21.809</b> |

  

| Random effects | Variance | SD    |
|----------------|----------|-------|
| Block          | 0.011    | 0.105 |
| Residual       | 0.087    | 0.295 |

  

| Fixed effects | $\chi^2$ | df | P-value |
|---------------|----------|----|---------|
| Treatment     | 0.141    | 1  | 0.227   |
| Position      | 0.260    | 1  | 0.109   |

$$Y_{ijk} = \beta_0 + \beta_1 \cdot \text{treatment}_{ij} + u_j + \epsilon_{ij}$$

Table S11: Model selection and summary statistics of ANOVA for effect of tillage (conventional, CA, CA+biochar) on cumulative N<sub>2</sub>O emissions (kg N<sub>2</sub>O-N ha<sup>-1</sup>) in season 1 and 2. Variance and standard deviation (SD) are shown for the random effect and chi-square ( $\chi^2$ ), degrees of freedom (df) and significance (P-value) are shown for the fixed effects. Results are presented in Fig 6a, Fig 6b, S4.

| Models                                                     | AIC            | BIC            |
|------------------------------------------------------------|----------------|----------------|
| mod1: cumN2O ~ treatment × season × position + (1   block) | -37.262        | -11.065        |
| <b>mod2: cumN2O ~ treatment × position (1   block)</b>     | <b>-42.002</b> | <b>-27.001</b> |

| Random effects | Variance | SD    |
|----------------|----------|-------|
| Block          | 0.000    | 0.000 |
| Residual       | 0.017    | 0.132 |

| Fixed effects        | $\chi^2$ | df | P-value |
|----------------------|----------|----|---------|
| Treatment            | 0.287    | 2  | 0.001   |
| Position             | 0.028    | 1  | 0.213   |
| Treatment × Position | 0.197    | 2  | 0.006   |

$$Y_{ijk} = \beta_0 + \beta_1 \cdot \text{treatment}_j + \beta_2 \cdot \text{position}_j + u_k + \epsilon_{ij}$$

Table S12: Model selection and summary statistics of ANOVA for effect of tillage (conventional, CA, CA+biochar) on cumulative N<sub>2</sub>O emissions (kg N<sub>2</sub>O-N ha<sup>-1</sup>) across all seasons. Variance and standard deviation (SD) are shown for the random effect and chi-square ( $\chi^2$ ), degrees of freedom (df) and significance (P-value) are shown for the fixed effects. Results are presented in Fig 6c, S4c.

| Models                                                   | AIC          | BIC           |
|----------------------------------------------------------|--------------|---------------|
| <b>mod1: cumN2O ~ treatment × position + (1   block)</b> | <b>7.706</b> | <b>17.130</b> |
| mod2: cumN2O ~ treatment + position (1   block)          | 11.709       | 18.777        |

| Random effects | Variance | SD    |
|----------------|----------|-------|
| Block          | 0.000    | 0.000 |
| Residual       | 0.041    | 0.204 |

| Fixed effects        | $\chi^2$ | df | P-value |
|----------------------|----------|----|---------|
| Treatment            | 0.583    | 2  | 0.003   |
| Position             | 0.056    | 1  | 0.256   |
| Treatment × Position | 0.393    | 2  | 0.018   |

## Results

Table S21: Soil and biochar properties. This is based on the background soil sampling (0-20 cm) taken in March 2023 for site characterisation.

| Parameters                         | Gulu       | Biochar |
|------------------------------------|------------|---------|
| pH                                 | 6.71       | 9.74    |
| TOC (%)                            | 1.52       | 50.90   |
| N (%)                              | 0.11       | 0.76    |
| C/N                                | 13.82      | 67.30   |
| Available P (mg kg <sup>-1</sup> ) | 6          | 710     |
| Ca (mg kg <sup>-1</sup> )          | 620        | 10133   |
| Fe (mg kg <sup>-1</sup> )          | 56         | 217     |
| K (mg kg <sup>-1</sup> )           | 210        | 13000   |
| Mg (mg kg <sup>-1</sup> )          | 120        | 1500    |
| Zn (mg kg <sup>-1</sup> )          | 1.1        | 8.53    |
| Clay %                             | 4          |         |
| Silt %                             | 16         |         |
| Sand %                             | 80         |         |
| Texture                            | loamy sand |         |

Namatsheve et al. (2025)



119 Chamber positions

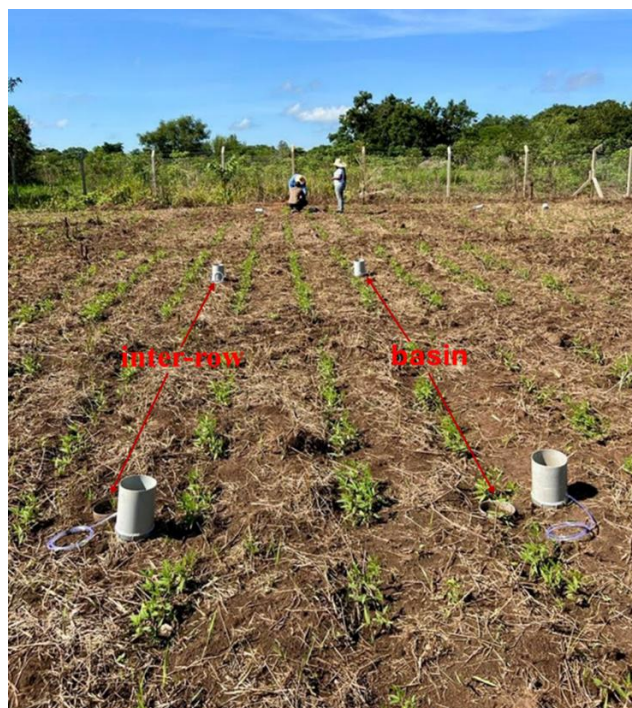

120

121 Fig S1: Fig chamber position between rows and in a basin, during the first season with pigeon  
122 pea on 11 May 2023.

123

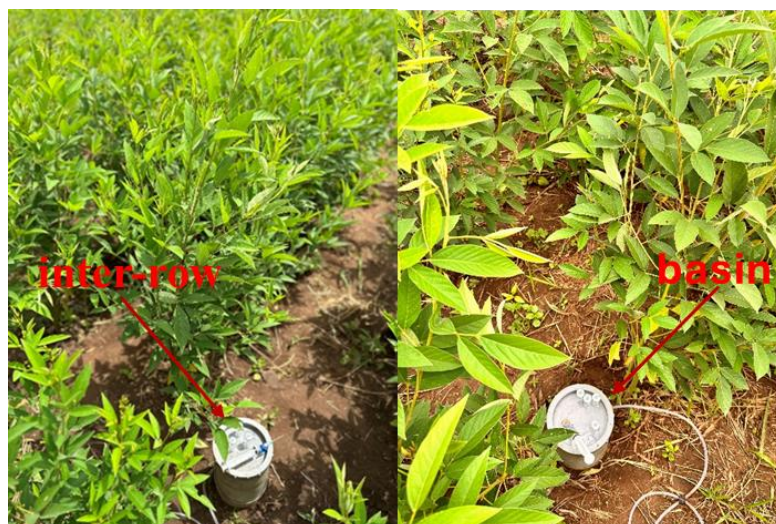

124

125

126 Fig S2: Chamber position between rows and in a basin, during the first season with pigeon  
127 pea on 14 July 2023.

128

129

130

Results

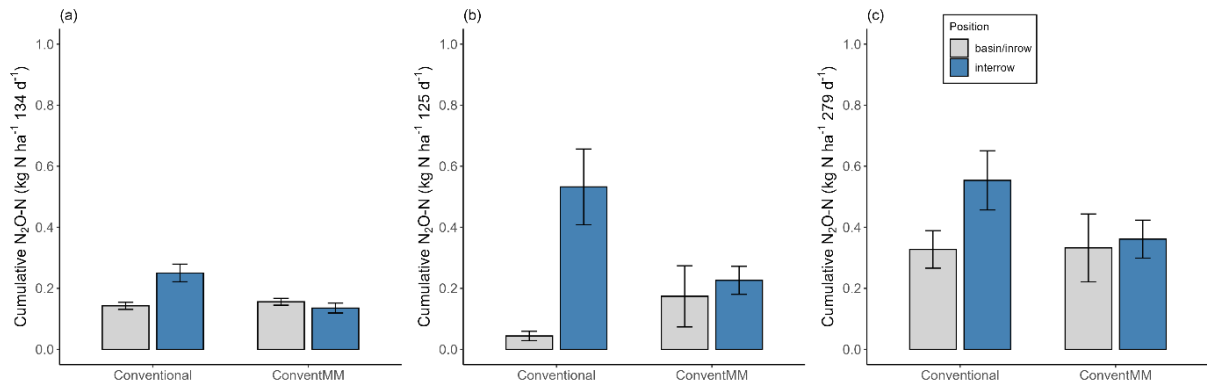

Fig S3: Effect of rotation on upscaled cumulative  $N_2O$  emissions, in Gulu. Assumption (0.12 basin and 0.88 interrow) for CA treatments and (0.50 basin and 0.50 interrow) for conventional.

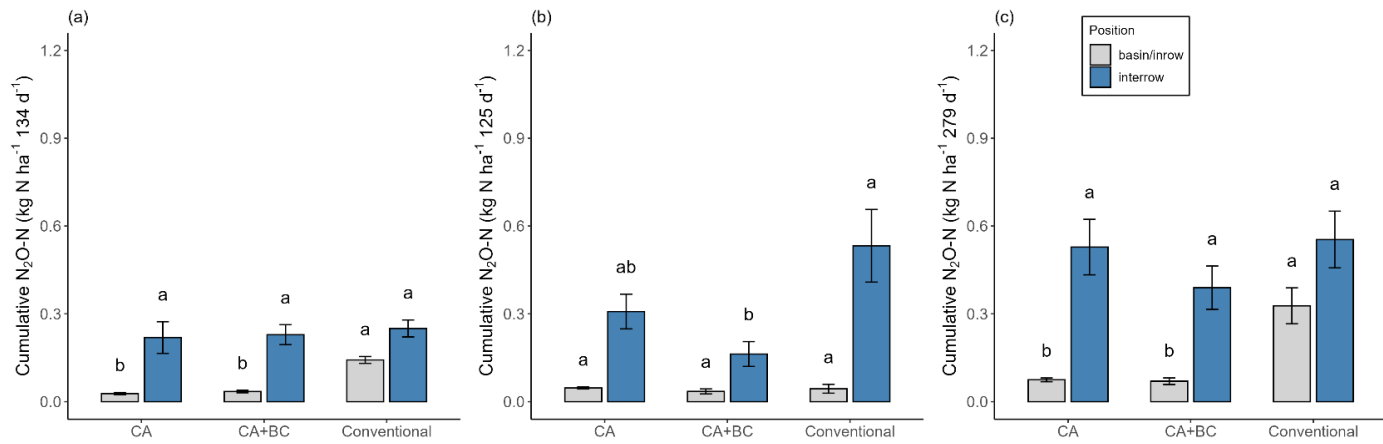

Fig S4: Effect of tillage on upscaled cumulative  $N_2O$  emissions, in Gulu. Assumption (0.12 basin and 0.88 interrow) for CA treatments and (0.50 basin and 0.50 interrow) for conventional.
